# Supplementary material for: HMGB4 is expressed by neuronal cells and affects the expression of genes involved in neural differentiation
Source: PubMed Central journal article supplement (PMC5036535; doi:10.1038/srep32960), 2016-09-09
Supplement: srep32960-s1.pdf [file srep32960-s1.pdf]

## **HMGB4 is expressed by neuronal cells and affects the expression of genes involved in neural differentiation**

Ari Rouhiainen, Xiang Zhao, Päivi Vanttola, Kui Qian, Evgeny Kuleskiy, Juha Kuja-Panula, Kathleen Gransalke, Mikaela Grönholm, Emmanuel Unni, Marvin Meistrich, Li Tian, Petri Auvinen and Heikki Rauvala

**Supplementary figure S1.** qPCR analysis of pro-apoptotic gene expression in HMGB4-EGFP –expressing cells. H1, H2A and H3A = HMGB4-EGFP expressing cells; E3, E4 and E5 = EGFP –expressing cells.

**Supplementary figure S2.** Expression of HMGB4 in human brain tissue samples. Human brain expression data was obtained from Medisapiens –database and HMGB4 expression in different brain areas was analyzed with PANTHER -software.

**Supplementary table S1.** STRING database search predicted HMGB4 protein interaction partners. Different mammalian species were included in the search. The six most prominent hits are shown. SUPT16H = Facilitates chromatin transcription complex subunit suppressor of Ty 16 homolog; SSRP1 = Structure specific recognition protein 1 ; TOP2A/B = Topoisomerases 2A and 2B ; H2AFV/Z = Histone H2A.V and H2A.Z ; GFT2A1L/B = general transcription factor IIA, 1-like and general transcription factor IIB ; POLR1E = DNA-directed RNA polymerase I subunit RPA49.

**Supplementary table S2.** List of genes differentially expressed in HMGB4-EGFP expressing HEK 293T-cells.

Supplementary figure S1

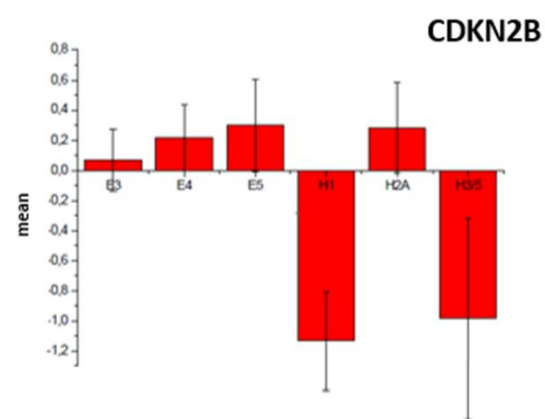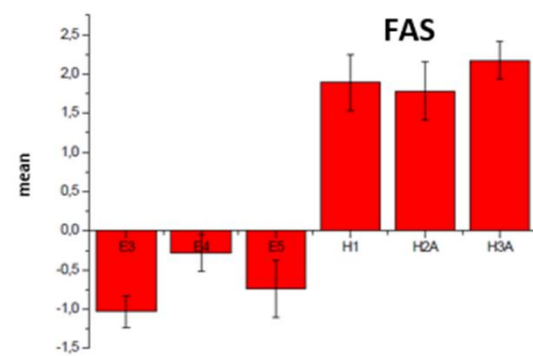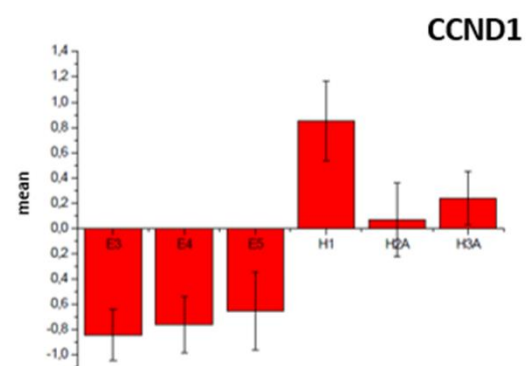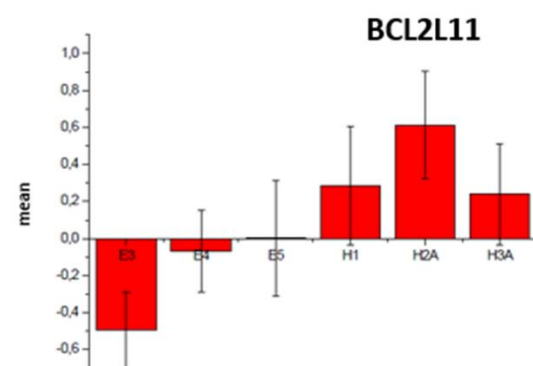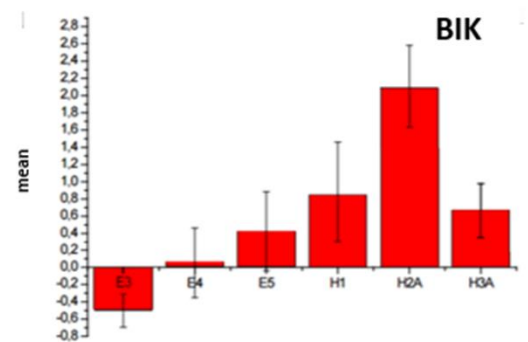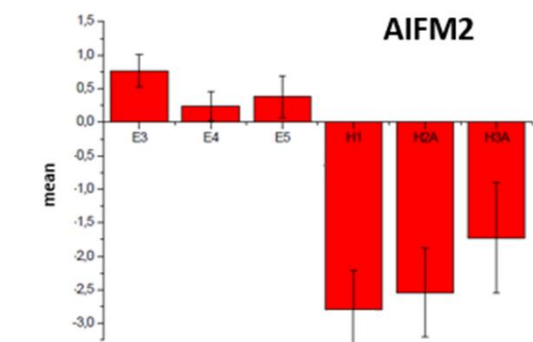

# Supplementary figure S2

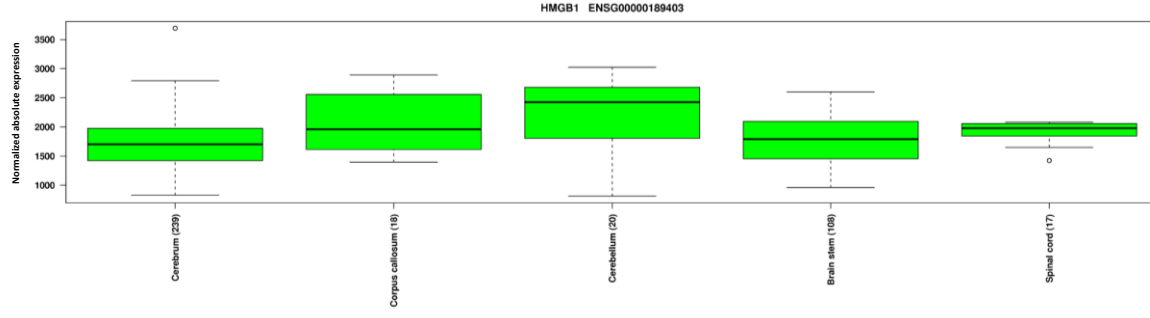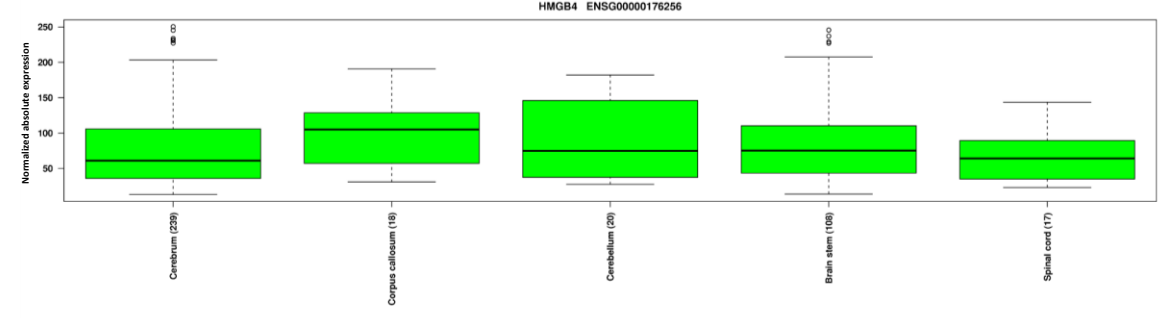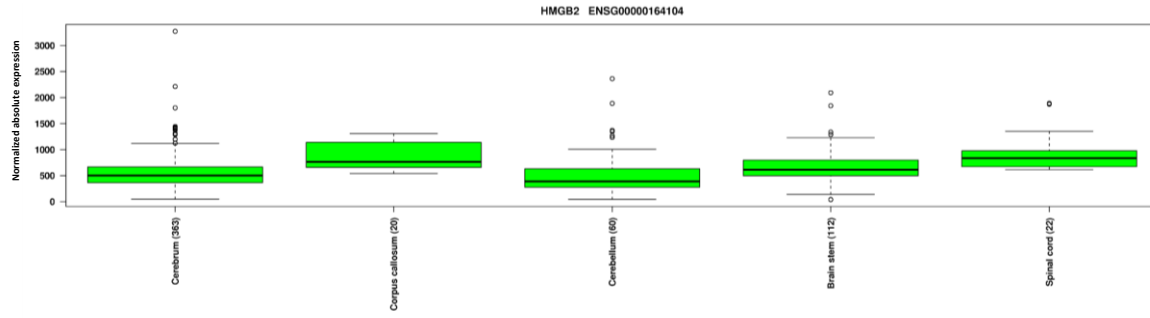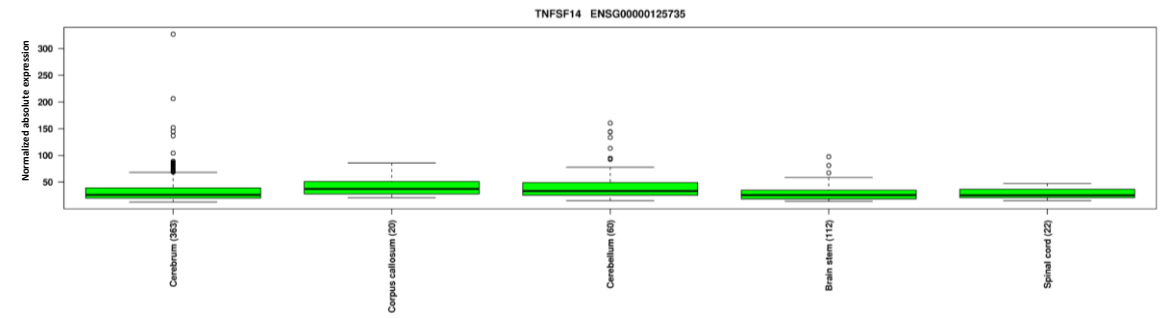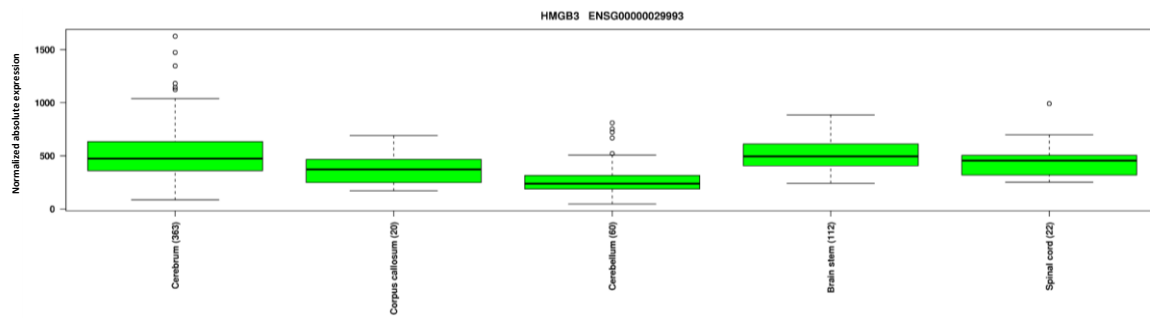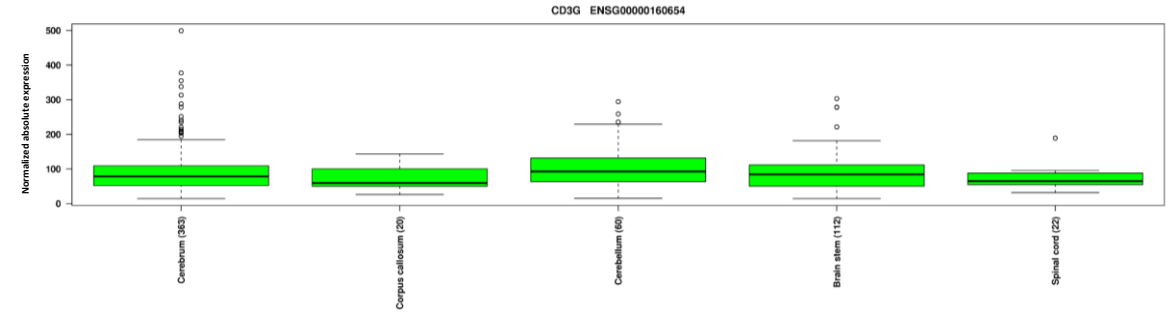

Supplementary table S1

|                              | <b>SUPT16H</b> | <b>SSRP1</b> | <b>TOP2A/B</b> | <b>H2AFV/Z</b> | <b>GFT2A1L/B</b> | <b>POLR1E</b> |   |
|------------------------------|----------------|--------------|----------------|----------------|------------------|---------------|---|
| <b>Homo sapiens</b>          | v              | v            | v              | v              |                  |               |   |
| <b>Mus musculus</b>          | v              | v            |                |                |                  | v             |   |
| <b>Rattus norvegicus</b>     | v              | v            |                |                |                  | v             |   |
| <b>Bos taurus</b>            | v              |              | v              |                |                  | v             | v |
| <b>Monodelphis domestica</b> | v              |              | v              | v              |                  | v             | v |
| <b>Dasyus novemcinctus</b>   | v              | v            |                |                |                  |               | v |
| <b>Pteropus vampyrus</b>     | v              | v            |                | v              |                  | v             | v |
| <b>Sarcophilus harrisii</b>  | v              |              | v              | v              |                  | v             | v |
| <b>Tursiops truncatus</b>    | v              |              | v              | v              |                  |               | v |
